# Supplementary material
Source: PubMed Central journal article supplement (PMC9122347)
Supplement: NIHMS838292-supplement-Supplementary_Material.pdf [file NIHMS838292-supplement-Supplementary_Material.pdf]

**Supplemental Table. Locations of the National Conference on Health Disparities (NCHD) and the Academic Institutions of the Student Research Forum (SRF) Participants, 2011-2018<sup>a</sup> in Alphabetical Order**

| <b>NCHD 2011<br/>Charleston, SC</b>     | <b>NCHD 2012<br/>Little Rock, AR</b>             | <b>NCHD 2013<br/>St. Thomas, USVI</b>        | <b>NCHD 2014<br/>Long Beach, CA</b>           | <b>NCHD 2016<br/>Washington, DC</b>      | <b>NCHD 2017<br/>New Orleans, LA</b>           | <b>NCHD 2018<br/>Philadelphia, PA</b>                              |
|-----------------------------------------|--------------------------------------------------|----------------------------------------------|-----------------------------------------------|------------------------------------------|------------------------------------------------|--------------------------------------------------------------------|
| Allen University in South Carolina      | Allen University in South Carolina               | California State University Long Beach       | Allen University in South Carolina            | Allen University in South Carolina       | Allen University in South Carolina             | Allen University in South Carolina                                 |
| California State University, Long Beach | Arkansas Baptist College                         | Clemson University in South Carolina         | California State University - Dominguez Hills | California State University Long Beach   | California State University - Monterey Bay     | Baylor College of Medicine in Texas                                |
| Clafin University in South Carolina     | Benedict College in South Carolina               | Emory University in Atlanta                  | California State University - Fullerton       | California State University Monterey Bay | California State University - Northridge       | Boston College in Massachusetts                                    |
| College of Charleston in South Carolina | California State University Long Beach           | Georgia Southern University                  | California State University - Long Beach      | Charles Drew University in California    | Case Western Reserve University in Ohio        | California State University - Monterey Bay                         |
| Medical University of South Carolina    | College of Charleston in South Carolina          | Jackson State University in Mississippi      | California State University - Monterey Bay    | College of William & Mary in Virginia    | Clafin University in South Carolina            | The Catholic University of America in Washington, DC               |
| South Carolina State University         | Georgia Southern University                      | Johns Hopkins University in Maryland         | California State University - Northridge      | Columbia University in New York          | Elon University in North Carolina              | College of Charleston in South Carolina                            |
|                                         | Georgia State University                         | Medical University of South Carolina         | California State University - San Bernardino  | Drexel University in Pennsylvania        | George Washington University in Washington, DC | Drexel University in Pennsylvania                                  |
|                                         | Johns Hopkins University in Maryland             | Morehouse School of Medicine in Georgia      | Columbia University in New York               | East Tennessee State University          | Quinnipiac University in Connecticut           | Georgia Southern University                                        |
|                                         | Harvard School of Public Health in Massachusetts | Morgan State University in Maryland          | Georgia State University                      | Eastern Virginia Medical School          | Santa Clara University in California           | Johns Hopkins University in Maryland                               |
|                                         | Medical University of South Carolina             | Rensselaer Polytechnic Institute in New York | Medical University of South Carolina          | Emory University in Georgia              | Tulane University in Louisiana                 | Long Beach Memorial Medical Center in California - Family Medicine |

| <b>NCHD 2011<br/>Charleston, SC</b> | <b>NCHD 2012<br/>Little Rock, AR</b>        | <b>NCHD 2013<br/>St. Thomas, USVI</b>       | <b>NCHD 2014<br/>Long Beach, CA</b>        | <b>NCHD 2016<br/>Washington, DC</b>           | <b>NCHD 2017<br/>New Orleans, LA</b>      | <b>NCHD 2018<br/>Philadelphia, PA</b>                   |
|-------------------------------------|---------------------------------------------|---------------------------------------------|--------------------------------------------|-----------------------------------------------|-------------------------------------------|---------------------------------------------------------|
|                                     | Morehouse College in Georgia                | Rowan University in New Jersey              | Meharry Medical College in Tennessee       | Goethe University Frankfurt Germany           | University of Florida                     | Medical University of South Carolina                    |
|                                     | Philander Smith College in Arkansas         | Spelman College in Georgia                  | Morehouse School of Medicine               | Manhattan College in New York                 | University of Illinois - Chicago          | Montclair State University in New Jersey                |
|                                     | Spelman College in Georgia                  | University of Arkansas for Medical Sciences | Occidental College in California           | Medical University of South Carolina          | University of Miami Miller in Florida     | Ohio State University                                   |
|                                     | University of Arkansas for Medical Sciences | University of Nevada - Las Vegas            | San Diego State University                 | Rochester Institute of Technology in New York | University of North Carolina - Greensboro | Rowan University in New Jersey                          |
|                                     | University of Bedfordshire, UK              | University of South Carolina                | Spelman College in Georgia                 | Spelman College in Georgia                    | University of Southern California         | State University of New York - Albany                   |
|                                     | University of Florida                       | University of Toledo Medical Center in Ohio | Tufts University in Massachusetts          | State University of New York Downstate        | University of Texas - El Paso             | Tuskegee University in Alabama                          |
|                                     | University of Michigan                      | University of the Virgin Islands            | University of California -Davis            | Texas A & M University                        | University of Virginia                    | University of Arkansas                                  |
|                                     | University of North Carolina Chapel Hill    | University of the West Indies - Mona        | University of California - Irvine          | Texas Tech University                         | University of Washington                  | University of California - San Diego                    |
|                                     | University of South Carolina                | University of Wisconsin                     | University of Illinois-Chicago             | University of California - Irvine             | University of Wisconsin-Madison           | University of Memphis in Tennessee                      |
|                                     | Vanderbilt School of Medicine in Tennessee  |                                             | University of Kansas                       | University of Colorado - Denver               | Walden University                         | University of Michigan                                  |
|                                     |                                             |                                             | University of Massachusetts                | University of Florida                         | Xavier University of Louisiana            | University of Nevada - Las Vegas                        |
|                                     |                                             |                                             | University of North Carolina - Chapel Hill | University of Georgia                         |                                           | University of North Texas Health Science Center at Fort |

| <b>NCHD 2011<br/>Charleston, SC</b> | <b>NCHD 2012<br/>Little Rock, AR</b> | <b>NCHD 2013<br/>St. Thomas, USVI</b> | <b>NCHD 2014<br/>Long Beach, CA</b> | <b>NCHD 2016<br/>Washington, DC</b>        | <b>NCHD 2017<br/>New Orleans, LA</b> | <b>NCHD 2018<br/>Philadelphia, PA</b>  |
|-------------------------------------|--------------------------------------|---------------------------------------|-------------------------------------|--------------------------------------------|--------------------------------------|----------------------------------------|
|                                     |                                      |                                       |                                     |                                            |                                      | Worth                                  |
|                                     |                                      |                                       | University of Southern California   | University of Kansas                       |                                      | University of South Carolina           |
|                                     |                                      |                                       | University of Texas - Austin        | University of Kentucky                     |                                      | University of Texas Health San Antonio |
|                                     |                                      |                                       | University of the Virgin Islands    | University of Memphis in Tennessee         |                                      | University of Washington               |
|                                     |                                      |                                       | Wayne State University in Michigan  | University of Michigan - Ann Arbor         |                                      | University of Wisconsin - Madison      |
|                                     |                                      |                                       |                                     | University of North Carolina - Chapel Hill |                                      |                                        |
|                                     |                                      |                                       |                                     | University of Southern California          |                                      |                                        |
|                                     |                                      |                                       |                                     | University of the Virgin Islands           |                                      |                                        |
|                                     |                                      |                                       |                                     | University of Wisconsin - Madison          |                                      |                                        |
|                                     |                                      |                                       |                                     | University of Wisconsin - Green Bay        |                                      |                                        |
|                                     |                                      |                                       |                                     | Virginia Commonwealth University           |                                      |                                        |

Abbreviations: SC, South Carolina; AR, Arkansas; UK, United Kingdom; USVI, United States Virgin Islands; CA, California; DC, District of Columbia; LA, Louisiana; PA, Pennsylvania.

<sup>a</sup> The NCHD SRF was not held in 2015.
